# Supplementary material for: Untargeted metabolomics combined with pseudotargeted lipidomics revealed the metabolite profiles of blood-stasis syndrome in type 2 diabetes mellitus
Source: PubMed Central journal article supplement — Heliyon. 2024 Oct 18;10(20):e39554. doi: 10.1016/j.heliyon.2024.e39554 (PMC11533630; doi:10.1016/j.heliyon.2024.e39554), 2024-10-18
Supplement: mmc1.pdf [file mmc1.pdf]

· 临床论著 ·

# 2 型糖尿病患者中医证型与血清代谢学指标相关性研究

刘 蓁<sup>1</sup> 丁小燕<sup>1</sup> 刘晓林<sup>1</sup> 王红芹<sup>2</sup> 祁轶斐<sup>2</sup> 周庆兵<sup>3</sup> 刘艳飞<sup>2</sup> 吴立旗<sup>2</sup> 徐榛敏<sup>4</sup>  
陈宝鑫<sup>5</sup> 童文新<sup>2</sup> 徐凤芹<sup>2</sup> 张 颖<sup>2</sup>

**摘要** **目的** 比较 2 型糖尿病 (T2DM) 不同中医证型之间一般情况以及实验室指标的差异。**方法** 于 2021 年 10 月 9 日—11 月 9 日采集北京市海淀区居民一般情况、中医辨证信息及血清样本。筛选符合标准的患者,参考相关糖尿病中医辨证标准将其分为气阴两虚组、痰热互结组、血瘀脉络组、阴阳两虚组;另筛选 31 名健康人作为对照组。检测患者空腹血糖 (FPG)、糖化血红蛋白 (HbA1c),甘油三酯 (TG)、总胆固醇 (TC)、低密度脂蛋白 (LDL-C)、高密度脂蛋白 (HDL-C)、同型半胱氨酸 (Hcy) 水平,采用 Logistic 回归进行相关性分析。**结果** 完成调查的居民共 1 189 例,符合纳排标准的居民共 136 例 (气阴两虚组 35 例、痰热互结组 34 例、血瘀脉络组 28 例、阴阳两虚组 39 例)。与对照组比较,阴阳两虚组年龄及 BMI 升高 ( $P<0.05$ ),气阴两虚组年龄升高 ( $P<0.05$ )。与阴阳两虚组比较,痰热互结组 BMI 指数降低 ( $P<0.05$ );气阴两虚证组、痰热互结组、血瘀脉络组病程缩短 ( $P<0.05$ );痰热互结组男性腰围及气阴两虚组女性腰围降低 ( $P<0.05$ )。与对照组比较,4 个证型组 HbA1c、SBP 偏高 ( $P<0.01$ );痰热互结组及血瘀脉络组 FPG、Hcy 水平升高 ( $P<0.05$ );气阴两虚组 TG 升高 ( $P<0.05$ )。与对照组和气阴两虚组比较,痰热互结组、血瘀脉络组 Hcy 水平升高 ( $P<0.05$ )。气阴两虚组与 FPG ( $P<0.05$ )、HbA1c ( $P<0.01$ )、SBP ( $P<0.05$ ) 呈正相关;痰热互结组与 FPG ( $P<0.01$ )、HbA1c ( $P<0.01$ )、SBP ( $P<0.05$ ) 呈正相关;血瘀脉络组与 FPG ( $P<0.05$ )、HbA1c ( $P<0.01$ )、Hcy ( $P<0.05$ )、BMI 指数 ( $P<0.05$ )、SBP ( $P<0.05$ ) 呈正相关;阴阳两虚证与 FPG ( $P<0.05$ )、HbA1c ( $P<0.01$ )、BMI 指数 ( $P<0.05$ )、SBP ( $P<0.01$ ) 呈正相关。**结论** 2 型糖尿病中医证型与血清代谢指标具有一定相关性,血瘀脉络证与 Hcy 呈正相关。(No. ChiCTR1900025713)

**关键词** 2 型糖尿病; 中医证型; 血瘀证; 同型半胱氨酸; 动脉粥样硬化

**Chinese Medicine Syndromes and Serum Metabolic Indices in Type II Diabetic Patients: A Correlational Study** LIU Li<sup>1</sup>, DING Xiao-yan<sup>1</sup>, LIU Xiao-lin<sup>1</sup>, WANG Hong-qin<sup>2</sup>, QI Yi-fei<sup>2</sup>, ZHOU Qing-bing<sup>3</sup>, LIU Yan-fei<sup>2</sup>, WU Li-qi<sup>2</sup>, XU Zhen-min<sup>4</sup>, CHEN Bao-xin<sup>5</sup>, TONG Wen-xin<sup>2</sup>, XU Feng-qin<sup>2</sup>, and ZHANG Ying<sup>2</sup> 1 Graduate School, China Academy of Chinese Medical Sciences, Beijing (100700); 2 General Internal Department, Xiyuan Hospital of China Academy of Chinese Medical Sciences, Beijing (100091); 3 Institute of Geriatric Medicine, Xiyuan Hospital of China Academy of Chinese Medical Sciences, Beijing (100091); 4 Encephalopathy Department, Xiyuan Hospital of China Academy of Chinese Medical Sciences, Beijing (100091); 5 Second Department of Encephalopathy, Dongfang Hospital, Beijing University of Chinese Medicine, Beijing (100078)

**ABSTRACT Objective** To compare differentiation of general conditions and laboratory indices among different syndromes in Chinese medicine (CM) of type II diabetes mellitus (T2DM). **Methods** The study was

基金名称: 科技部国家重点研发计划资助项目 (No. 2018YFC1704303); 国家自然科学基金面上项目 (No. 81774143); 国家中医药管理局中医药传承与创新“百千万”人才工程-中医技术传承骨干人才; 中国中医科学院科技创新工程重大攻关项目 (No. CI2021A01407)

作者单位: 1. 中国中医科学院研究生院 (北京 100700); 2. 中国中医科学院西苑医院综合内科 (北京 100091); 3. 中国中医科学院西苑医院老年病研究所 (北京 100091); 4. 中国中医科学院西苑医院脑病科 (北京 100091); 5. 北京中医药大学东方医院脑病二科 (北京 100078)

通讯作者: 张 颖, Tel: 010-67689749, E-mail: doctoronline@126.com

DOI: 10. 7661/j. cjim. 20220921.242

conducted among residents in Haidian district of Beijing from October 9, 2021 to November 9, 2021. The data of general conditions among different syndromes in CM and laboratory indices of participants were collected. The participants who met the criteria were assigned to 4 groups with the main syndromes of CM, Qi-Yin deficiency group, phlegm-heat interaction group, blood-stasis group and Yin-Yang deficiency group. And 31 healthy volunteers were recruited as control group. Fasting blood glucose (FPG), glycosylated hemoglobin (HbA1c), triglyceride (TG), total cholesterol (TC), low density lipoprotein (LDL-C), high density lipoprotein (HDL-C) and homocysteine (Hcy) were measured. Logistic regression was used for correlation analysis. **Results** Among a total of 1 189 participants, 136 cases who met the inclusion and exclusion criteria completed the study (35 cases in the Qi-Yin deficiency group, 34 cases in the phlegm-heat interaction group, 28 cases in the blood-stasis group and 39 cases in the Yin-Yang deficiency group). Compared with the control group, the age and BMI of the Yin-Yang deficiency group increased ( $P<0.05$ ), and the age of the Qi-Yin deficiency group was significantly older ( $P<0.05$ ). Compared with the Yin-Yang deficiency group, the BMI of the phlegm-heat group was lower ( $P<0.05$ ), the disease duration of the Qi-Yin deficiency group, the phlegm-heat interaction group, and the blood-stasis group were shorter, and the waist circumference of the men in the phlegm-heat group and the women in the Qi-Yin deficiency group were lower ( $P<0.05$ ). Compared with the control group, the levels of HbA1c and SBP in the four syndrome groups increased ( $P<0.01$ ), and the levels of FPG and Hcy in the phlegm-heat interaction group and the blood-stasis group increased ( $P<0.05$ ), and the levels of TG in the Qi-Yin deficiency group also increased ( $P<0.05$ ). Compared with the control group and the Qi-Yin deficiency group, the Hcy levels in the phlegm-heat interaction group and the blood-stasis group increased ( $P<0.05$ ). Qi-yin deficiency group was positively correlated with FPG ( $P<0.05$ ), HbA1c ( $P<0.01$ ) and SBP ( $P<0.05$ ). There was a positive correlation between phlegm-heat interaction group and FPG ( $P<0.01$ ), HbA1c ( $P<0.01$ ), SBP ( $P<0.05$ ). Blood stasis group was positively correlated with FPG ( $P<0.05$ ), HbA1c ( $P<0.01$ ), Hcy ( $P<0.05$ ), BMI ( $P<0.05$ ) and SBP ( $P<0.05$ ). Yin-Yang deficiency group was positively correlated with FPG ( $P<0.05$ ), HbA1c ( $P<0.01$ ), BMI ( $P<0.05$ ) and SBP ( $P<0.01$ ). **Conclusions** The syndromes of CM in T2DM patients are correlated with serum metabolic indices. Blood-Stasis syndrome is significantly positively correlated with Hcy level in blood.

**KEYWORDS** type II diabetes mellitus; Chinese medicine syndromes; blood-stasis; homocysteine; atherosclerosis

我国 2 型糖尿病 (type 2 diabetes mellitus, T2DM) 患病率近 30 年来显著增加, 2015–2017 年达到 11.2%, 但糖尿病知晓率 (36.5%)、治疗率 (32.2%) 和控制率 (49.2%) 有所改善<sup>[1]</sup>; 糖尿病伴随多个系统并发症, 其中心血管疾病是 T2DM 患者致死致残的主要原因<sup>[2]</sup>, 糖尿病也是心血管疾病的主要独立危险因素之一<sup>[3-5]</sup>, 因此, T2DM 及其心血管系统并发症的发生发展机制逐步成为研究焦点。2 型糖尿病属中医学“消渴类病”范畴, 中医学对其认识最早可追溯至《内经》时期, 《素问·奇病论》言“夫五味入口, 藏于胃, 脾为之行其精气津液在脾, 故令人口甘也……肥者, 令人内热, 甘者令人中满, 故其气上溢, 转为消渴”<sup>[6]</sup>。糖尿病以过食肥甘伤于脾胃发病, 易生内热耗气伤阴, 常见中医证型有气阴两虚证、痰热互结证、血瘀络证、阴阳两虚证等<sup>[7]</sup>。本研究在 T2DM 各证型与健康人之间进行一般情况和血清代谢学指标的比较, 以明确各证型差异。

## 资料与方法

### 1 诊断标准及中医辨证分型标准

1.1 诊断标准 T2DM 的诊断参考《中国 2 型糖尿病防治指南 (2020 年版)》<sup>[1]</sup>: 满足以下任意 1 条即可确诊为糖尿病。(1) 糖尿病症状加随机血糖  $\geq 11.1$  mmol/L; (2) 空腹血糖  $\geq 7.0$  mmol/L; (3) 葡萄糖负荷 2 h 后血糖  $\geq 11.1$  mmol/L。

1.2 中医辨证分型标准 中医辨证标准参考《中药新药临床研究指导原则 (试行)》<sup>[7]</sup>、《2 型糖尿病病证结合诊疗指南》2021 版<sup>[8]</sup> 及中华中医药学会《中医糖尿病临床诊疗指南》2020 版<sup>[9]</sup>, 结合近十年糖尿病辨证相关文献参考, 经由课题组成员共同讨论, 3 位主任级别医师共同制定本研究中中医辨证标准如下: (1) 痰热互结证: 形体肥胖, 腹部胀大, 口干口渴, 喜冷饮, 饮水量多, 脘腹胀满, 易饥多食, 心烦口苦, 大便干结, 小便色黄, 舌质淡红, 苔黄腻,

脉弦滑。(2) 血瘀络证: 胸痛, 胁痛, 部位固定, 或为刺痛, 肢体麻木, 疼痛夜甚。肌肤甲错, 口唇紫暗, 面部瘀斑, 健忘心悸, 心烦失眠, 舌质暗, 有瘀斑, 舌下脉络青紫迂回, 脉弦, 或沉而涩。(3) 气阴两虚证: 咽干口燥, 倦怠乏力, 多食易饥, 口渴喜饮, 气短懒言, 五心烦热, 心悸失眠, 溲赤便秘, 舌红少津液, 苔薄或花剥, 脉细数无力, 或细而弦。(4) 阴阳两虚证: 神疲乏力, 咽干口燥, 腰膝酸冷, 或手足畏寒, 夜尿频多, 头晕眼花, 心悸失眠, 自汗易感, 气短懒言, 颜面肢体浮肿, 尿多浊沫, 或小便量少, 男子阳痿, 女子性欲淡漠, 大便干稀不调。舌体胖大, 有齿痕, 脉沉细无力。

## 2 纳入及排除标准

2.1 纳入标准 (1) 符合 T2DM 诊断标准, 符合中医证型分型标准;(2) 年龄 >18 岁;(3) 病程 >1 年, 且长期规律用药者;(4) 签署知情同意书者。

2.2 排除标准 (1) 合并心血管疾病、脑卒中者;(2) 不能够配合完成相关病史资料及中医证候表的采集者;(3) 妊娠期糖尿病、特殊类型糖尿病及分型不明的糖尿病患者;(4) 精神疾病、肿瘤、严重肝肾功能不全者;(5) 合并 2 型糖尿病酮症酸中毒等并发症患者;(6) 资料不完整者;(7) 3 个月内参与其他临床试验者;(8) 近期服用叶酸、维生素 B12 者。

3 脱落及剔除标准 本研究为非干预性研究, 纳入研究对象不存在后续脱落和剔除。

4 样本量计算 样本量估算遵循 Kendall 准则, 样本数目是问卷条目 (12 个) 的 5~10 倍<sup>[10]</sup>, 考虑数据不全样本占比为 10%, 纳入样本量至少为 134 例, 根据 4 个中医证型组纳入人数均数, 决定纳入健康对照组 31 例。

5 一般资料 研究对象为北京市海淀区居民, 研究人员为经过培训的中医专业研究生及主任级别医师, 调查日期为 2021 年 10 月 9 日—11 月 9 日, 完成调查的居民共 1 189 例。最终符合纳排标准的居民共 136 例, 其中男性 61 例, 女性 75 例, 平均年龄为 (68.13 ± 10.13) 岁, 其中气阴两虚组 35 例, 包含男性 12 例、女性 23 例、高血压病史者 24 例、血脂异常病史者 20 例; 痰热互结组 34 例, 包含男性 16 例、女性 18 例、高血压病史者 17 例、血脂异常病史者 19 例; 血瘀络证组 28 例, 包含男性 14 例、女性 14 例、高血压病史者 15 例、血脂异常病史者 19 例; 阴阳两虚组 39 例, 包含男性 19 例、女性 20 例、高血压病史者 27 例、血脂异常病史者 23 例。另筛选同批无糖尿病史、心血管病史、脑卒中病史、血糖血脂异常病

史、资料完整的健康人 31 名作为对照组, 男性 12 名, 女性 19 名, 平均年龄 (63.50 ± 9.66) 岁。经检验, 各组间一般资料比较差异无统计学意义 ( $P > 0.05$ )。本研究经过中国中医科学院西苑医院伦理委员会批准 (No. 2021XLA001-1)。本研究已在中国临床试验注册中心完成注册 (No. ChiCTR1900025713)。

## 6 研究方法

6.1 信息采集 (1) 基本信息采集: 研究人员采集身高、体重、腰围、一般信息。(2) 中医四诊及证候表信息采集: 舌脉、中医症候表信息的采集均由经过培训的中医专业研究生负责, 按“望闻问切”的顺序采集四诊信息, 再以问诊方式完成中医证候表。(2) 血清样本采集: 受试者清晨空腹, 由护士采集静脉血, 于 EDTA 紫色抗凝管保存。(3) 仪器和试纸: 血糖检测采用安稳 +Air 血糖仪、血糖测试条 (50 人份/盒, 三诺生物传感股份有限公司生产, 生产批号: 140328); 糖化血红蛋白检测采用特定蛋白分析仪、糖化血红蛋白检测试剂盒 (25 人份/盒, 石家庄禾柏生物技术股份有限公司生产, 生产批号: FA210714); 同型半胱氨酸检测采用特定蛋白分析仪、同型半胱氨酸检测试剂盒 (25 人份/盒, 石家庄禾柏生物技术股份有限公司生产, 生产批号: GA210621); 血脂检测采用干式生化分析仪、干化学法脂类检测条 (15 人份/盒, Polymer Technology Systems, Inc 生产, 生产批号: P115)。(4) 检测方法: 糖化血红蛋白以免疫散射速率法进行检测, 同型半胱氨酸以循环酶法检测, 血脂以酶法、反射光度法检测。(5) 体重指数 (body mass index, BMI) = 体重 (kg) / 身高<sup>2</sup> (m<sup>2</sup>)。(6) 资料的整理和分类: 根据舌脉和中医症候表, 由三名研究人员分别对研究对象进行中医辨证分型, 如有分歧则请示课题组主任级别医师。

6.2 观察指标 性别、年龄、BMI 指数、腰围、病程、血压 [包括收缩压 (systolic blood pressure, SBP) 和舒张压 (diastolic blood pressure, DBP)]、空腹血糖 (fasting blood-glucose, FPG)、糖化血红蛋白 (glycosylated hemoglobin, HbA1c)、甘油三酯 (triglyceride, TG)、总胆固醇 (total cholesterol, TC)、低密度脂蛋白 (low density lipoprotein, LDL-C)、高密度脂蛋白 (high density lipoprotein, HDL-C)、同型半胱氨酸 (homocysteine, Hcy)。

7 统计学方法 应用 SPSS 23.0 统计软件进行数据分析。正态分布的计量资料以  $\bar{x} \pm s$  表示, 方差齐时采用方差分析, 方差不齐时采用 Welch 检验, 非正态分布的计量资料采用 Kruskal-wallis 秩和检验。

计数资料的对比采用  $\chi^2$  检验。采用 Logistic 回归进行相关性分析。 $P < 0.05$  为差异有统计学意义。

### 结 果

1 各组一般情况比较 (表 1、2) 与对照组比较, 阴阳两虚组年龄及 BMI 升高 ( $P < 0.05$ ), 气阴两虚组年龄升高 ( $P < 0.05$ ); 与阴阳两虚组比较, 痰热互结组 BMI 指数降低 ( $P < 0.05$ ), 气阴两虚、痰热互结、血瘀脉络组病程缩短 ( $P < 0.05$ ); 与阴阳两虚组比较, 痰热互结组男性腰围及气阴两虚组女性腰围降低 ( $P < 0.05$ ); 与血瘀脉络组比较, 痰热互结组男性腰围降低 ( $P < 0.05$ )。

2 各组相关指标比较及分析 (表 3) 与对照组比较, 4 个证型组 HbA1c、SBP 水平升高 ( $P < 0.01$ ), 同时, 痰热互结组及血瘀脉络组 FPG、Hcy 水平升高 ( $P < 0.05$ ), 气阴两虚组 TG 升高 ( $P < 0.05$ )。与气阴两虚组比较, 痰热互结组、血瘀脉络组 Hcy 升高 ( $P < 0.05$ )。

3 各证型组 Logistic 回归结果 (表 4) 以对照组为基线进行 Logistic 回归, 结果显示气阴两虚组与 FPG ( $P < 0.05$ )、HbA1c ( $P < 0.01$ )、SBP ( $P < 0.05$ ) 呈正相关; 痰热互结组与 FPG ( $P < 0.01$ )、HbA1c ( $P < 0.01$ )、SBP ( $P < 0.05$ ) 呈正相关; 血瘀脉络组与 FPG ( $P < 0.05$ )、HbA1c ( $P < 0.01$ )、Hcy ( $P < 0.05$ )、BMI 指数 ( $P < 0.05$ )、SBP ( $P < 0.05$ ) 呈正相关; 阴阳两虚证与 FPG ( $P < 0.05$ )、HbA1c ( $P < 0.01$ )、

表 2 各组男女腰围比较 (cm,  $\bar{x} \pm s$ )

| 组别   | 男                           | 女             |
|------|-----------------------------|---------------|
| 气阴两虚 | 90.05 ± 9.69                | 81.17 ± 9.79* |
| 痰热互结 | 84.94 ± 10.20* <sup>△</sup> | 86.55 ± 9.74  |
| 血瘀脉络 | 94.36 ± 10.26               | 84.57 ± 8.07  |
| 阴阳两虚 | 93.00 ± 8.42                | 87.94 ± 9.04  |
| 对照   | 90.08 ± 7.65                | 86.56 ± 9.13  |
| F 值  | 2.19                        | 1.67          |
| P 值  | 0.08                        | 0.17          |

注: 与阴阳两虚组比较, \* $P < 0.05$ ; 与血瘀脉络组比较, <sup>△</sup> $P < 0.05$

BMI 指数 ( $P < 0.05$ )、SBP ( $P < 0.01$ ) 呈正相关。T2DM 各中医证型组均与 FPG、HbA1c、SBP 呈正相关, 除此之外, 气阴两虚与 HbA1c 正相关性较强; 仅血瘀脉络组与 Hcy 呈现正相关, 同时血瘀脉络组、阴阳两虚组与 BMI 指数呈正相关。TG、TC、LDL-C、HDL-C、男女腰围等指标均未见明显相关性。

### 讨 论

糖尿病是由遗传和环境因素的复合病因引起的以慢性高血糖为特征的代谢性疾病, 其生发展常常并存肥胖或消瘦、血脂代谢的异常、血压的升高。本研究对象为非新诊且长期系统用药的 T2DM 患者, 除分析辨证客观化依据外, 还可以系统分析现行治疗手段的疾病控制效果以及中医病机发展规律。研究发现, T2DM 患者的 TC、LDL-C、HDL-C、DBP 等指标均与对照组无明显差异, 总体说明本次研究纳入的

表 1 各组证型一般情况比较

| 组别           | 例数 | 男 [例 (%) ]        | 年龄 (岁, $\bar{x} \pm s$ )   | BMI (kg/m <sup>2</sup> , $\bar{x} \pm s$ ) | 病程 (年, $\bar{x} \pm s$ ) |
|--------------|----|-------------------|----------------------------|--------------------------------------------|--------------------------|
| 气阴两虚         | 35 | 34.29             | 68.69 ± 10.77              | 24.58 ± 2.87                               | 9.91 ± 6.90*             |
| 痰热互结         | 34 | 47.05             | 66.82 ± 9.74               | 23.51 ± 3.06*                              | 8.29 ± 6.61*             |
| 血瘀脉络         | 28 | 50.00             | 67.36 ± 11.46              | 25.13 ± 2.86                               | 10.60 ± 7.23*            |
| 阴阳两虚         | 39 | 48.72             | 69.31 ± 9.06               | 26.39 ± 6.60                               | 14.82 ± 10.64            |
| 对照           | 31 | 38.71             | 63.50 ± 9.66* <sup>△</sup> | 23.67 ± 2.31*                              | /                        |
| $\chi^2/F$ 值 |    | 2.58 <sup>▲</sup> | 1.63 <sup>○</sup>          | 2.38 <sup>○</sup>                          | 4.31 <sup>○</sup>        |
| P 值          |    | 0.63              | 0.17                       | 0.73                                       | 0.06                     |

注: 与阴阳两虚组比较, \* $P < 0.05$ ; 与气阴两虚组比较, <sup>△</sup> $P < 0.05$ ; <sup>▲</sup>为  $\chi^2$  值; <sup>○</sup>为 F 值

表 3 各证型组及对照组相关指标对比分析

| 组别   | 例数 | FPG (mmol/L)  | HbA1c (%)     | TG (mmol/L)  | TC (mmol/L) | LDL-C (mmol/L) | HDL-C (mmol/L) | Hcy (μmol/L)               | SBP (mmHg)       | DBP (mmHg)    |
|------|----|---------------|---------------|--------------|-------------|----------------|----------------|----------------------------|------------------|---------------|
| 气阴两虚 | 35 | 8.02 ± 3.48   | 7.01 ± 1.96** | 1.72 ± 0.85* | 4.43 ± 1.15 | 2.32 ± 1.00    | 1.32 ± 0.30    | 14.14 ± 4.88               | 141.94 ± 12.10** | 80.97 ± 12.06 |
| 痰热互结 | 34 | 9.36 ± 13.10* | 6.70 ± 1.34** | 1.35 ± 0.80  | 4.02 ± 1.25 | 2.13 ± 1.04    | 1.38 ± 0.40    | 17.77 ± 6.32* <sup>△</sup> | 142.35 ± 17.18** | 81.44 ± 11.91 |
| 血瘀脉络 | 28 | 8.52 ± 2.36*  | 6.90 ± 1.66** | 1.53 ± 0.75  | 4.09 ± 0.92 | 2.10 ± 0.71    | 1.33 ± 0.30    | 18.83 ± 13.3* <sup>△</sup> | 141.71 ± 20.34** | 82.21 ± 9.36  |
| 阴阳两虚 | 39 | 7.57 ± 2.20   | 6.55 ± 1.02** | 1.65 ± 1.13  | 4.19 ± 1.10 | 2.18 ± 0.97    | 1.34 ± 0.30    | 15.67 ± 5.43               | 142.77 ± 18.01** | 82.97 ± 9.05  |
| 对照   | 31 | 5.07 ± 2.51   | 5.40 ± 1.13   | 1.27 ± 0.70  | 3.14 ± 1.03 | 2.03 ± 0.71    | 1.43 ± 0.27    | 13.41 ± 4.40               | 124.35 ± 6.27    | 80.71 ± 4.94  |
| F 值  |    | 2.05          | 6.56          | 1.67         | 1.24        | 1.27           | 0.52           | 3.11                       | 7.38             | 0.31          |
| P 值  |    | 0.09          | 0.00          | 0.16         | 0.30        | 0.28           | 0.71           | 0.02                       | 0.00             | 0.87          |

注: 与对照组比较, \* $P < 0.05$ , \*\* $P < 0.01$ ; 与气阴两虚组比较, <sup>△</sup> $P < 0.05$ , <sup>△△</sup> $P < 0.01$

表 4 各证型组 Logistic 回归分析

| 证型   | 指标                       | P    | B     | OR   | 95%CI      |
|------|--------------------------|------|-------|------|------------|
| 气阴两虚 | FPG (mmol/L)             | 0.02 | 0.37  | 1.45 | 1.07-1.97  |
|      | HbA1c (%)                | 0.00 | 1.42  | 4.12 | 1.99-8.77  |
|      | SBP (mmHg)               | 0.02 | 0.06  | 1.06 | 1.02-1.10  |
|      | TG (mmol/L)              | 0.99 | 0.02  | 1.02 | 0.33-3.07  |
|      | TC (mmol/L)              | 0.25 | 0.95  | 2.59 | 0.52-12.93 |
|      | LDL-C (mmol/L)           | 0.14 | -1.23 | 0.29 | 0.06-1.50  |
|      | HDL-C (mmol/L)           | 0.16 | -1.88 | 0.15 | 0.01-2.11  |
|      | 男性腰围 (cm)                | 0.43 | 0.04  | 1.04 | 0.95-1.14  |
|      | 女性腰围 (cm)                | 0.07 | -0.06 | 0.94 | 0.88-1.01  |
| 痰热互结 | FPG (mmol/L)             | 0.00 | 0.43  | 1.54 | 1.15-2.07  |
|      | HbA1c (%)                | 0.00 | 1.12  | 3.07 | 1.45-6.50  |
|      | SBP (mmHg)               | 0.04 | 0.06  | 1.06 | 1.02-1.09  |
|      | TG (mmol/L)              | 0.60 | -0.30 | 0.74 | 0.24-2.28  |
|      | TC (mmol/L)              | 0.61 | 0.37  | 1.45 | 0.34-6.12  |
|      | LDL-C (mmol/L)           | 0.19 | -0.97 | 0.38 | 0.09-1.63  |
|      | HDL-C (mmol/L)           | 0.71 | -0.46 | 0.63 | 0.06-7.20  |
|      | 男性腰围 (cm)                | 0.24 | -0.05 | 0.95 | 0.87-1.04  |
|      | 女性腰围 (cm)                | 0.87 | 0.01  | 1.01 | 0.94-1.08  |
| 血瘀脉络 | FPG (mmol/L)             | 0.01 | 0.41  | 1.51 | 1.12-2.03  |
|      | HbA1c (%)                | 0.00 | 1.30  | 3.67 | 1.72-7.84  |
|      | Hcy (μmol/L)             | 0.02 | 0.47  | 1.56 | 1.27-2.14  |
|      | BMI (kg/m <sup>2</sup> ) | 0.03 | 0.30  | 1.34 | 1.03-1.75  |
|      | SBP (mmHg)               | 0.01 | 0.07  | 1.07 | 1.03-1.11  |
|      | TG (mmol/L)              | 0.68 | -0.25 | 0.78 | 0.24-2.57  |
|      | TC (mmol/L)              | 0.40 | 0.74  | 2.10 | 0.37-11.83 |
|      | LDL-C (mmol/L)           | 0.15 | -0.29 | 0.27 | 0.05-1.57  |
|      | HDL-C (mmol/L)           | 0.56 | -0.81 | 0.45 | 0.03-6.95  |
|      | 男性腰围 (cm)                | 0.23 | 0.54  | 1.06 | 0.96-1.15  |
|      | 女性腰围 (cm)                | 0.60 | -0.02 | 0.97 | 0.90-1.05  |
| 阴阳两虚 | FPG (mmol/L)             | 0.01 | 0.38  | 1.46 | 1.08-1.97  |
|      | HbA1c (%)                | 0.00 | 1.18  | 3.24 | 1.54-6.83  |
|      | BMI (kg/m <sup>2</sup> ) | 0.01 | 0.34  | 1.41 | 1.09-1.81  |
|      | SBP (mmHg)               | 0.00 | 0.07  | 1.07 | 1.03-1.11  |
|      | TG (mmol/L)              | 0.85 | 0.10  | 1.10 | 0.39-3.10  |
|      | TC (mmol/L)              | 0.65 | 0.32  | 1.38 | 0.35-5.36  |
|      | LDL-C (mmol/L)           | 0.23 | -0.85 | 0.43 | 0.11-1.70  |
|      | HDL-C (mmol/L)           | 0.73 | -0.42 | 0.66 | 0.61-7.12  |
|      | 男性腰围 (cm)                | 0.99 | 0.00  | 1.00 | 0.92-1.08  |
|      | 女性腰围 (cm)                | 0.99 | 0.00  | 1.00 | 0.93-1.07  |

T2DM 患者血脂控制基本达标、状态相对平稳，从侧面反映了近年来我国糖尿病知晓率、治疗率、控制率有所改善。其中，HbA1c、SBP 在临界值附近，但明显高于对照组，说明糖尿病对胰腺功能和血管的损害不完全可逆。

既往研究表明，病程长短、FPG、TG 均与中医证型密切相关<sup>[11]</sup>，与本研究结论一致：糖尿病虚实夹

杂，最终由实转虚，阴阳两虚是糖尿病病理变化的最终阶段<sup>[11]</sup>，故阴阳两虚组病程最长；痰热互结组和血瘀脉络组 FPG 较对照组明显升高、气阴两虚组 TG 较对照组明显升高，FPG 和 TG 不同证型组之间比较无明显差异，提示痰热互结证和气阴两虚证 FPG 有升高趋势、气阴两虚证 TG 有升高趋势，T2DM 患者 FPG、TG 水平和中医证型的相关性有待进一步研究。本研究结果显示阴阳两虚组 BMI 值明显高于痰热互结组，阴阳两虚组男女腰围均偏大，可能与病程较长而损耗正气，内不能宣精微，外无力化痰湿，痰浊水饮停滞于肌腠，导致体型肥胖有关。

值得关注的是，在使用系统的降糖方案且血糖血脂控制基本达标的情况下，T2DM 患者各中医证型组仍呈现出 Hcy 的明显差异：痰热互结组和血瘀脉络组中 Hcy 较高，提示 T2DM 实证更易伴有 Hcy 的升高；Logistic 回归结果显示血瘀脉络组与 Hcy 水平呈正相关，提示血瘀脉络证与 Hcy 之间有着更加密切的联系。研究表明，Hcy 与颈动脉、冠状动脉、大动脉、周围血管病变等心血管系统疾病有着确切关联，同时也与缺血性心脏病和中风的风险有关<sup>[12]</sup>；Hcy 的升高与动脉粥样硬化发生率呈正相关<sup>[13]</sup>，是冠心病患者终点事件发生概率的强有力预测因子<sup>[14]</sup>。基础研究中，Hcy 被证实在内皮功能、内侧重塑和外膜炎症中发挥作用一系列毒性作用，可能与其导致内皮功能障碍和诱导血管炎症有关<sup>[15]</sup>。流行病学研究显示：血浆 Hcy 每升高 5 μmol/L，会使缺血性心脏病的患病风险增加 84%<sup>[16]</sup>；同时，我国约 75% 的高血压人群伴有 Hcy 升高，且 Hcy 升高显著影响降压药疗效<sup>[17]</sup>。目前对 Hcy 的控制方式主要为口服叶酸、维生素 B12、B6，但并没有研究支持这种治疗可以减少高 Hcy 引发的血管损伤<sup>[15]</sup>。此外，莫惠芳等<sup>[18]</sup>研究发现，糖尿病伴大血管病变患者血 Hcy 值显著高于糖尿病不伴大血管病变患者，并且随着血 Hcy 水平的升高，大血管及颈动脉病变的发病率逐渐增加；郭清华等<sup>[19]</sup>通过对比合并与不合并糖尿病微血管病变的 T2DM 患者血 Hcy 浓度，得出空腹高 Hcy 血症是糖尿病微血管病变的危险因子的结论，说明糖尿病患者高 Hcy 血症更易导致血管病变。相关研究表明，血瘀可能是血管损伤及动脉粥样硬化的重要病理机制，血瘀证可能与血液黏度、血小板活化、微循环障碍、炎症反应、血管内皮细胞、动脉粥样硬化因子、血栓等因素相关<sup>[20]</sup>，同时有研究显示，冠心病中医血瘀证多见 Hcy 水平的升高<sup>[21]</sup>，血 Hcy 也被证实可能在 2 型糖尿病患者的微血管病变诊断中具有一定

临床意义<sup>[22]</sup>，这与本研究中 T2DM 血瘀络证患者 Hcy 升高的结果吻合。因此 T2DM 中 Hcy 升高的机制研究可以作为糖尿病继发动脉粥样硬化的机制突破点；是否伴有 Hcy 升高的 T2DM 血瘀证患者为动脉粥样硬化的危险人群，值得进一步研究和探讨。临床上需重视伴有 Hcy 升高的 T2DM 患者可能的动脉粥样硬化发病风险，针对血 Hcy 升高，提前使用相应的活血化瘀药物或有着重大的临床意义<sup>[23]</sup>。本研究按照 T2DM 中医辨证进行分组，比较各证型组一般情况和实验室指标，所得结果与已有研究基本一致，另发现 T2DM 血瘀络证组血 Hcy 明显升高，可能导致动脉粥样硬化的发生。

由于本研究中证型纳入标准较为严格，对舌脉等中医诊断指标表现不一致或存在证型夹杂的对象均予以剔除，且存在地域局限性，故最终纳入样本量较少，因此可能存在研究结果偏差，尚需进行大样本、多中心的临床观察，从而明确 T2DM、血瘀证与血 Hcy 水平是否存在确切相关性，血 Hcy 水平的升高是否与 T2DM 继发动脉粥样硬化的发生有直接联系，以更好地发挥中医对 T2DM 并发动脉粥样硬化的防治作用。

利益冲突：无。

参 考 文 献

[ 1 ] 中华医学会糖尿病学分会. 中国 2 型糖尿病防治指南 (2020 年版) [J]. 中华内分泌代谢杂志, 2021, 37 (4): 311-398.

[ 2 ] 国家卫生健康委员会能力建设和继续教育中心, 孙艺红, 陈康, 等. 糖尿病患者合并心血管疾病诊治专家共识 [J]. 中华内科杂志, 2021, 60 (5): 421-437.

[ 3 ] 万学红, 卢雪峰主编. 诊断学 [M]. 北京: 人民卫生出版社, 2018: 371-379.

[ 4 ] 中华医学会心血管病学分会流行病学组, 中国医师协会心血管内科医师分会, 中国老年学学会心脑血管病专业委员会. 糖代谢异常与动脉粥样硬化性心血管疾病临床诊断和治疗指南 [J]. 中华心血管病杂志, 2015, 43 (6): 488-506.

[ 5 ] Piepoli MF, Hoes AW, Agewall S, et al. 2016 European Guidelines on cardiovascular disease prevention in clinical practice: The Sixth Joint Task Force of the European Society of Cardiology and Other Societies on Cardiovascular Disease Prevention in Clinical Practice (constituted by representatives of 10 societies and by invited experts) Developed with the special contribution of the European Association for Cardiovascular Prevention & Rehabilitation (EACPR) [J]. Eur Heart J, 2016, 37 (29): 2315-2381.

[ 6 ] 唐·王冰注. 黄帝内经素问 [M] 北京: 人民卫生出版社, 1956: 98.

[ 7 ] 郑筱萸主编. 中医新药临床研究指导原则 [M]. 北京: 中国医药科技出版社, 2002: 4.

[ 8 ] 庞国明, 倪青, 张芳. 2 型糖尿病病证结合诊疗指南 [J]. 中医杂志, 2021, 62 (4): 361-368.

[ 9 ] 中华中医药学会主编. 中医糖尿病临床诊疗指南 [M]. 北京: 中国中医药出版社, 2020: 4.

[ 10 ] 陈彬. 医学多因素分析设计样本例数估算——多因素分析设计样本例数综合估算法 [J]. 伤害医学 (电子版), 2012, 1 (4): 58-60.

[ 11 ] 冷雪, 谷丽艳, 朱芳. 2 型糖尿病中医证型流行病学调查及其中医病因病机初探 [J]. 中华中医药杂志, 2015, 30 (3): 732-735.

[ 12 ] Chrysant SG, Chrysant GS. The current status of homocysteine as a risk factor for cardiovascular disease: a mini review [J]. Expert Rev Cardiovasc Ther, 2018, 16 (8): 559-565.

[ 13 ] 沈文生, 周艳, 齐英斌, 等. 血浆同型半胱氨酸水平与颈动脉粥样硬化的相关性 [J]. 中国老年学杂志, 2022, 42 (3): 526-529.

[ 14 ] Rallidis LS, Kosmas N, Rallidi T, et al. Homocysteine is an independent predictor of long-term cardiac mortality in patients with stable coronary artery disease in the era of statins [J]. Coron Artery Dis, 2020, 31 (2): 152-156.

[ 15 ] Balint B, Jepchumba VK, Guéant JL, et al. Mechanisms of homocysteine-induced damage to the endothelial, medial and adventitial layers of the arterial wall [J]. Biochimie, 2020, 173: 100-106.

[ 16 ] Djuric D, Jakovljevic V, Zivkovic V, et al. Homocysteine and homocysteine-related compounds: an overview of the roles in the pathology of the cardiovascular and nervous systems [J]. Can J Physiol Pharmacol, 2018, 96 (10): 991-1003.

[ 17 ] 国家卫生计生委合理用药专家委员会, 中国医师协会高血压专业委员会. 高血压合理用药指南 (第 2 版) [J]. 中国医学前沿杂志 (电子版), 2017, 9 (7): 28-126.

[ 18 ] 莫惠芳, 张爱伦, 吴炯, 等. 同型半胱氨酸在糖尿病大血管病变中的意义及危险因素分析 [J]. 中华检验医学杂志, 2017, 40 (7): 526-531.

[ 19 ] 郭清华, 陆菊明, 秦海红, 等. 2 型糖尿病微血管病变患者血浆同型半胱氨酸的变化及其机制的探讨 [J]. 中国糖尿病杂志, 2002, 10 (1): 30-34.

[ 20 ] 时晶, 田金洲, 王永炎, 等. 血瘀证的生物学基础研究 [J]. 中华中医药杂志, 2006, 21 (6): 363-364.

[ 21 ] 严卉, 胡晓晨, 陈君柱, 等. 血浆同型半胱氨酸和冠状动脉粥样硬化严重程度与中医证型的关系 [J]. 中国中西医结合杂志, 2002, 22 (11): 813-815.

[ 22 ] 何小魁, 王胜来, 田子亮, 等. 血清血管内皮生长因子及同型半胱氨酸水平与 2 型糖尿病患者微血管病变的关系 [J]. 中华检验医学杂志, 2020, 43 (6): 628-634.

[ 23 ] 翁维良, 郭玉英, 钱穆英, 等. 对糖尿病人“瘀血”的研究 [J]. 中医杂志, 1982, 23 (1): 46-48.

(收稿: 2022-03-17 在线: 2023-01-02)  
责任编辑: 汤 静
